# Supplementary material for: Influence of Silver Nanoparticles on the Growth of Ascitic and Solid Ehrlich Adenocarcinoma: Focus on Copper Metabolism
Source: MDPI journal article supplement (doi:10.3390/pharmaceutics15041099), 2023-03-29
Supplement: s1 [file s1]

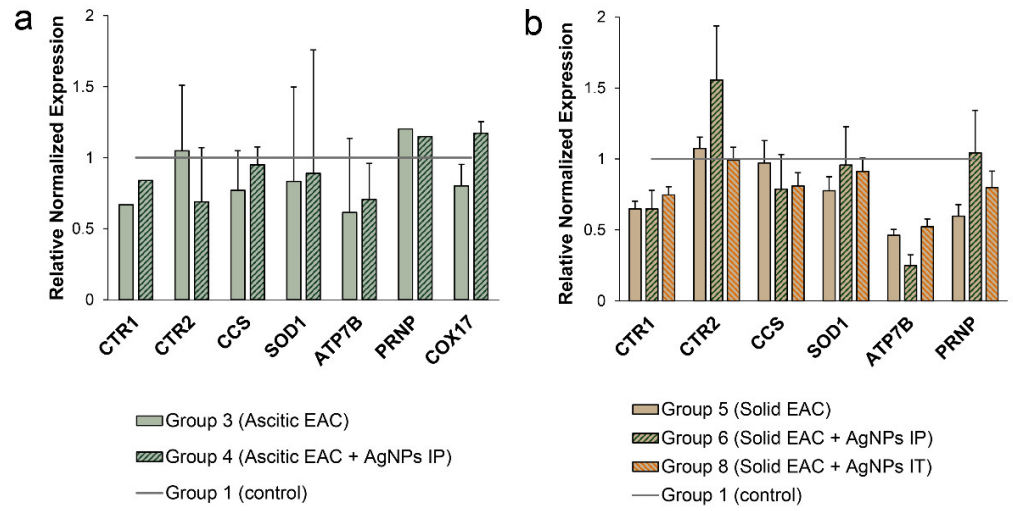

**Figure S1.** Expression of genes responsible for copper status of blood serum in the liver of mice with (a) ascitic EAC treated with AgNPs IP or (b) solid EAC treated with AgNPs IP or IT. Group numbers are the same as in Table 1.
